# Supplementary material for: Dual Inhibition of BMP and WNT Signals Promotes Pancreatic Differentiation from Human Pluripotent Stem Cells
Source: Hindawi journal article supplement (doi:10.1155/2019/5026793), 2019-12-01

# **Dual inhibition of BMP and WNT signals promotes pancreatic differentiation from human pluripotent stem cells**

Mengtian Tan<sup>1,2</sup>, Lai Jiang<sup>1</sup>, Yinglei Li<sup>1</sup>, Wei Jiang<sup>1,3,#</sup>

<sup>1</sup>Department of Biological Repositories, Zhongnan Hospital & Medical Research Institute, Wuhan University, Wuhan, China, 430071; <sup>2</sup>Affiliated Hospital of Hebei University of Engineering, Handan, China, 056038; <sup>3</sup>Hubei Provincial Key Laboratory of Developmentally Originated Disease, Wuhan, China, 430071

#To whom correspondence should be addressed. E-mail: [jiangw.mri@whu.edu.cn](mailto:jiangw.mri@whu.edu.cn)

The supplementary materials include four supplemental figures (Figure S1-S4) and two supplemental tables (Table S1-S2).

***Figure S1. The PDX1/AFP/CDX2 expression under various BMP inhibitors treatment.***

A. Immunofluorescence results showing co-staining of pancreatic markers PDX1 and pancreatic NKX6-1, hepatic AFP, and intestinal CDX2 while treated with different BMP inhibitors (i.e., LDN193189 targeting ALK2/3, K02288 blocking ALK1/2/3/6, LDN214117 exclusively targeting ALK2, Dorsomorphin recognized as BMP inhibitor and AMPK inhibitor, and NOGGIN) during endodermal patterning. B. The percentage of PDX1-positive cells determined by intracellular flow cytometry in similar conditions to A (n=3).

***Figure S2. The endodermal lineage differentiation upon treated with BMP inhibitor K02288.***

A. Immunofluorescence results exhibited control group (No BMP inhibitor) and BMPi (shown for K02288) in PP stage with pancreatic markers PDX1, liver marker AFP, and intestinal marker CDX2. Scale bars for Enlargement inset, 50  $\mu$ m. DAPI (blue) represented all cells for internal control. B. Flow cytometric analysis showed PDX1 expression in Control, BMPi (K02288). C. mRNA expression of *PDX1*, *NKX6-1*, *AFP*, and *CDX2* compared in control group and BMPi group (shown for K02288). \*\* represented for p-value < 0.01 and \*\*\* for p-value < 0.001 by student's *t* test (n=3). D. Co-staining PDX1 and NKX6-1 represented bona-fide pancreatic progenitors in BMPi (shown for K02288).

***Figure S3. BMP inhibitor K02288 regulated pancreatic differentiation via decreased WNT activity.***

A. The expression levels of WNT downstream genes (including *WNT3*, *TWIST1*, *AXIN2*, *MYC*) were analyzed between control group and BMPi group (using BMP inhibitor K02288) in PP stage (n=3). B-C. The protein of total beta-catenin and active beta-catenin were co-stained with PDX1 to show the intracellular localization (BMP inhibitor K02288).

**Figure S4. The beta cells generation upon treated with WNT inhibitor.**

Generated of INSULIN (red color) and PDX1 (green color) double-positive cells in Control group, BMPi group, WNTi group (XAV939) and “Dual i”. Scale bars for Enlargement inset, 50  $\mu$ m.

**Table S1. Information of chemical compounds used in this study.**

| Compounds Name                             | Company  | Catalog No.  | Concentration |
|--------------------------------------------|----------|--------------|---------------|
| Activin A                                  | Peprtech | Cat #120-14  | 100 ng/ml     |
| Wnt3a recombinant protein                  | R&D      | Cat #5036-WN | 50 ng/ml      |
| ascorbic acid                              | Sigma    | Cat #A4544   | 0.25 mM       |
| KGF                                        | R&D      | Cat #251-KG  | 50 ng/ml      |
| SANT1                                      | Selleck  | Cat #S7092   | 0.5 $\mu$ M   |
| TTNPB                                      | Selleck  | Cat #S4627   | 100 nM        |
| PDBU                                       | Sigma    | Cat #4153/1  | 500 nM        |
| K02288                                     | Selleck  | Cat #S7359   | 2 $\mu$ M     |
| LDN193189                                  | Selleck  | Cat #S2618   | 200 nM        |
| LDN214117                                  | Selleck  | Cat #S7627   | 2 $\mu$ M     |
| Dorsomorphin                               | Selleck  | Cat #S7840   | 2 $\mu$ M     |
| Noggin                                     | Peprtech | Cat #120-10C | 100 ng/ml     |
| XAV-939                                    | Selleck  | Cat #S1180   | 2 $\mu$ M     |
| IWR-1                                      | Selleck  | Cat #S7086   | 2 $\mu$ M     |
| T3 (L-3,3,5-Triiodothyronine, Sodium Salt) | Sigma    | Cat #T6397   | 1 $\mu$ M     |
| Repsox                                     | Selleck  | Cat #S7223   | 10 $\mu$ M    |
| YO-01027                                   | Selleck  | Cat #S2711   | 10 $\mu$ M    |
| zinc sulfate                               | Sigma    | Cat #Z0251   | 10 $\mu$ M    |
| Trolox                                     | EMD      | Cat #648471  | 10 $\mu$ M    |
| heparin sodium                             | Selleck  | Cat #S1346   | 10 $\mu$ g/ml |
| R428                                       | Selleck  | Cat #S2841   | 2 $\mu$ M     |
| N-cys                                      | Sigma    | Cat #A9165   | 10 mM         |

**Table S2. Information of antibodies used in this study.**

| Antibodies Name                 | Company                   | Catalog No. | Concentration |
|---------------------------------|---------------------------|-------------|---------------|
| antibodies against beta-catenin | Cell Signaling Technology | Cat #8480   | 1:100         |

|                                                              |                           |                   |        |
|--------------------------------------------------------------|---------------------------|-------------------|--------|
| active beta-catenin                                          | Cell Signaling Technology | Cat #8814         | 1:1000 |
| goat anti-human PDX1                                         | R&D                       | Cat #AF2419       | 1:200  |
| GAPDH                                                        | Proteintech               | Cat #60004-1-Ig   | 1:1000 |
| rabbit anti-human PDX1                                       | Abcam                     | Cat #ab47267      | 1:2000 |
| rabbit anti-human AFP                                        | Zhongshan                 | Cat #ZA0612       | 1:200  |
| rabbit anti-human CDX2                                       | Zhongshan                 | Cat #ZA0520       | 1:200  |
| mouse anti-human CHGA                                        | Zhongshan                 | Cat #ZM0076       | 1:200  |
| rabbit anti-human CHGA                                       | Zhongshan                 | Cat #ZA0507       | 1:200  |
| rabbit anti-human GLUCAGON                                   | Santa Cruz                | Cat #sc-7779-R    | 1:50   |
| mouse anti-human INSULIN                                     | Santa Cruz                | Cat #sc-8033      | 1:50   |
| rabbit anti-human INSULIN                                    | Santa Cruz                | Cat #sc-9168      | 1:50   |
| rat anti-C-Peptide                                           | DSHB                      | Cat #GN-ID4       | 1:200  |
| mouse anti-NKX6-1                                            | DSHB                      | Cat # F55A12      | 1:100  |
| mouse anti-pY489-beta-catenine                               | DSHB                      | Cat #PY489        | 1:100  |
| rabbit anti-beta-catenin                                     | Millipore                 | Cat #07-1653      | 1:200  |
| mouse anti-Pro-INSULIN                                       | DSHB                      | Cat #GS-9A8       | 1:50   |
| goat anti-human SOX2                                         | Santa Cruz                | Cat #17320        | 1:50   |
| TRITC conjugated donkey anti-rabbit IgG secondary antibodies | Jackson ImmunoResearch    | Cat #711-025-152  | 1:200  |
| TRITC conjugated donkey anti-goat IgG secondary antibodies   | Jackson ImmunoResearch    | Cat #705-025-147  | 1:200  |
| TRITC conjugated donkey anti-mouse IgG secondary antibodies  | Jackson ImmunoResearch    | Cat # 715-025-150 | 1:200  |
| 488-conjugated donkey anti-rabbit IgG secondary antibodies   | Jackson ImmunoResearch    | Cat #711-095-152  | 1:200  |
| 488-conjugated donkey anti-goat IgG secondary antibodies     | Jackson ImmunoResearch    | Cat #705-545-147  | 1:200  |
| 488-conjugated donkey anti-mouse IgG secondary antibodies    | Jackson ImmunoResearch    | Cat #715-545-150  | 1:200  |
| Cy <sup>TM</sup> 5 AffiniPure Donkey Anti-Goat IgG (H+L)     | Jackson ImmunoResearch    | Cat #705-175-147  | 1:500  |

Figure S1.

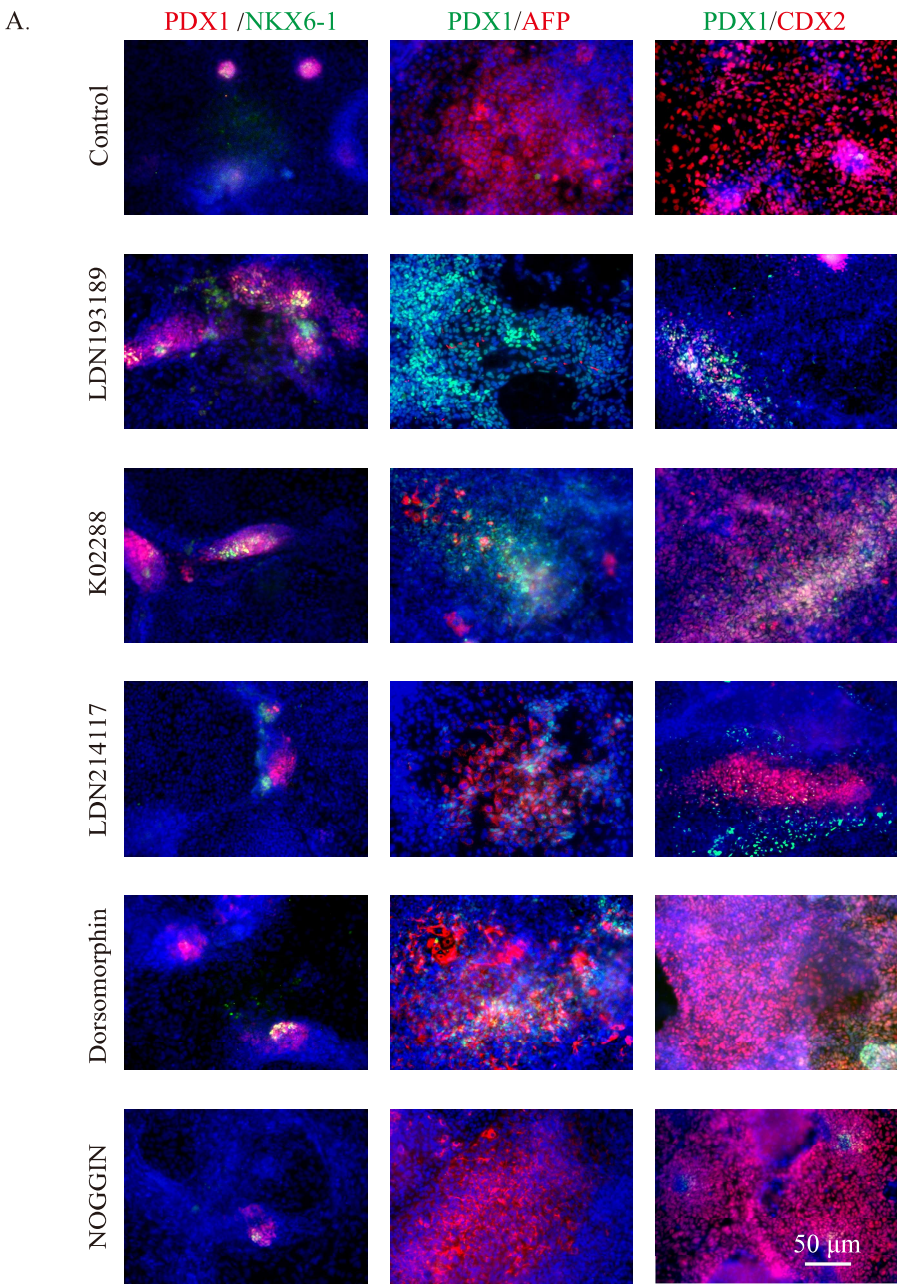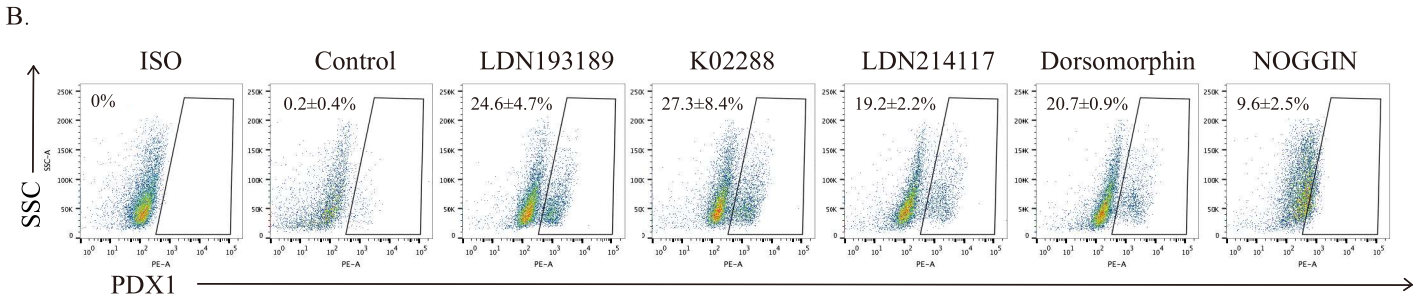

Figure S2.

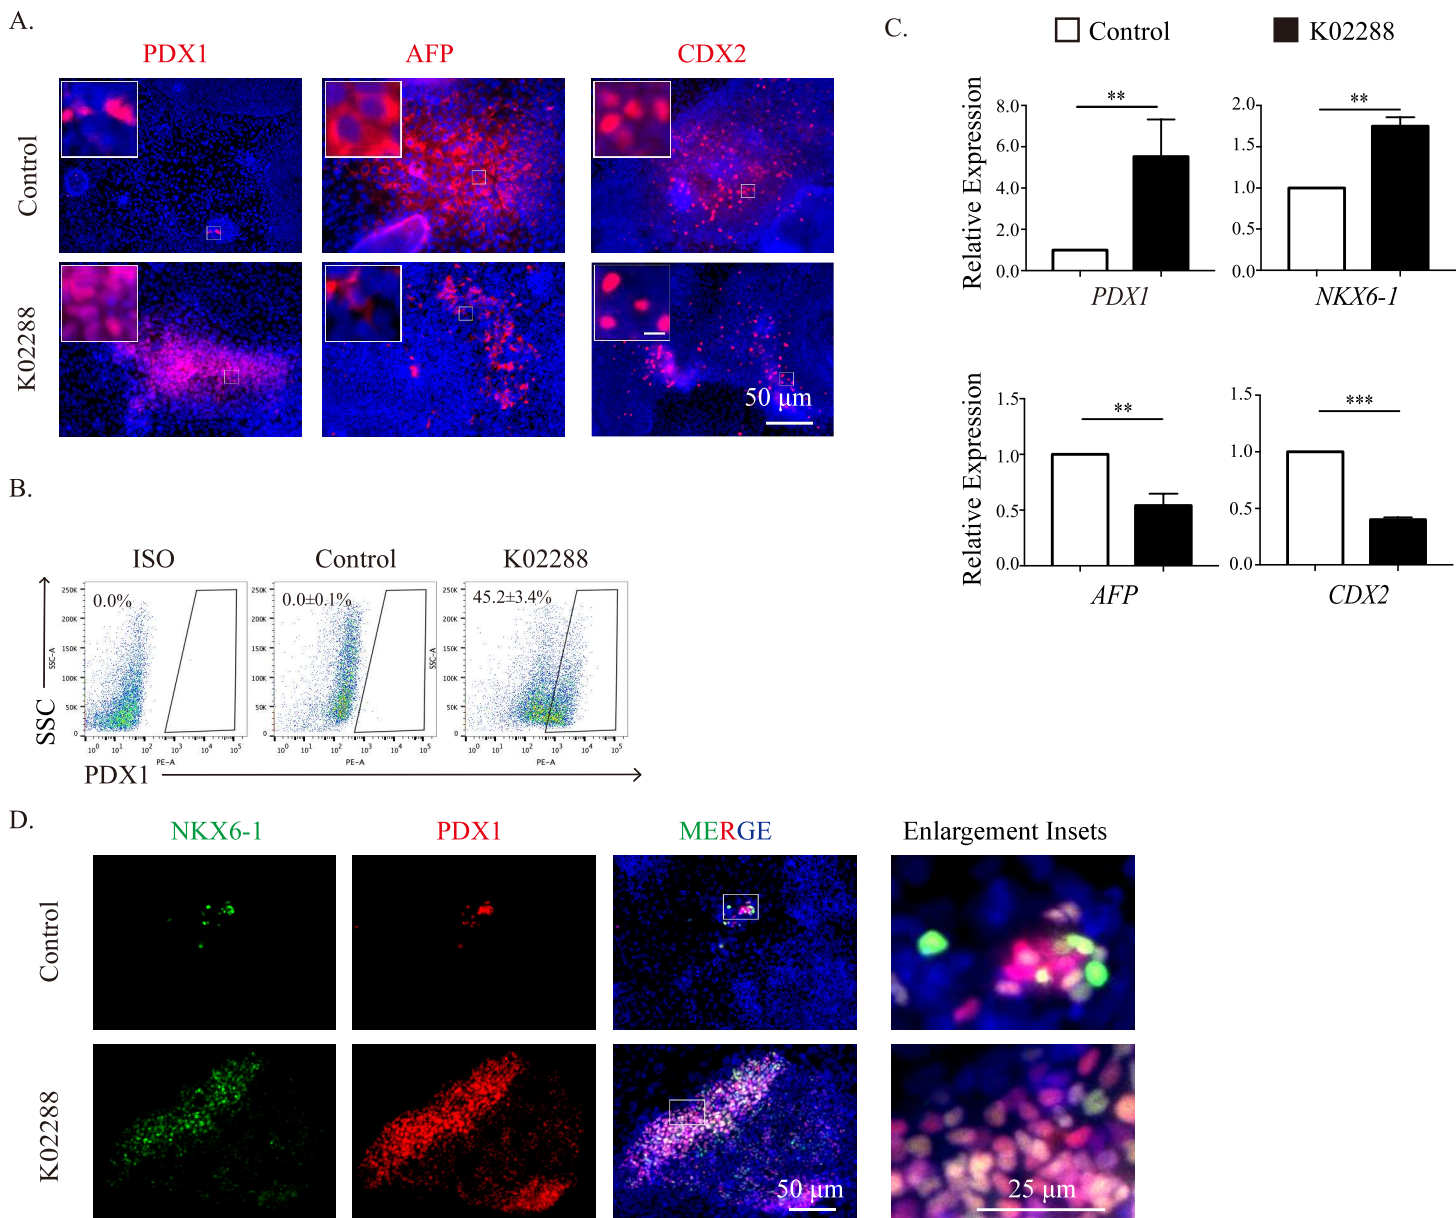



Figure S3.

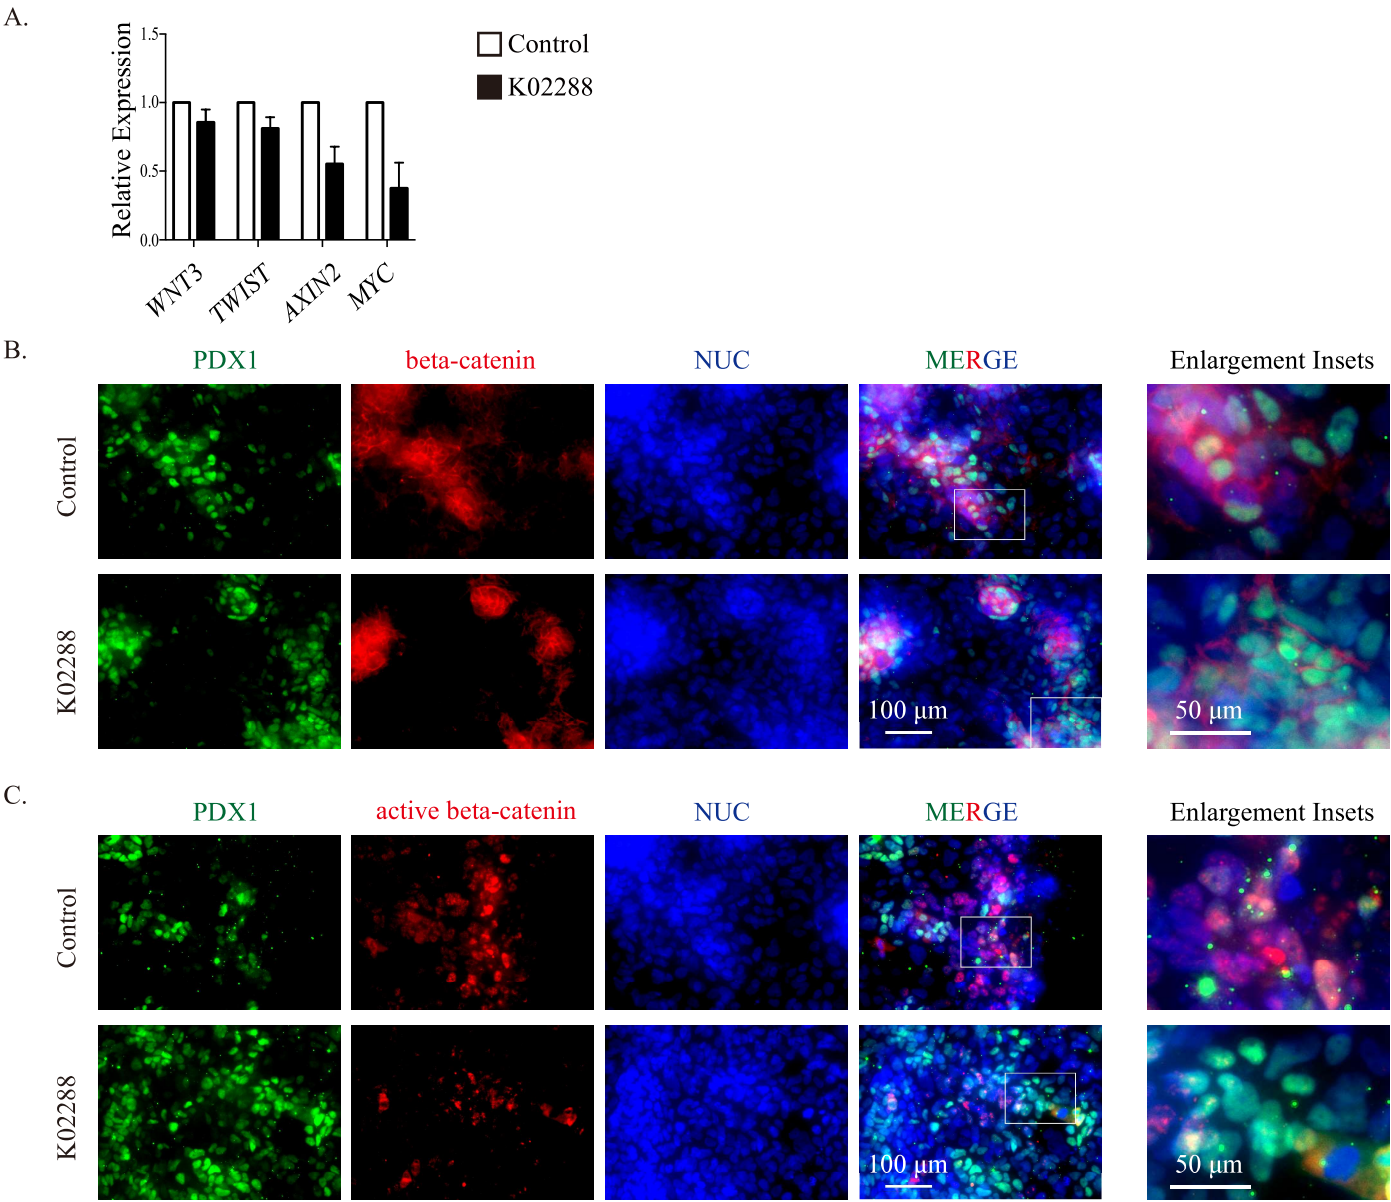

Figure S4.

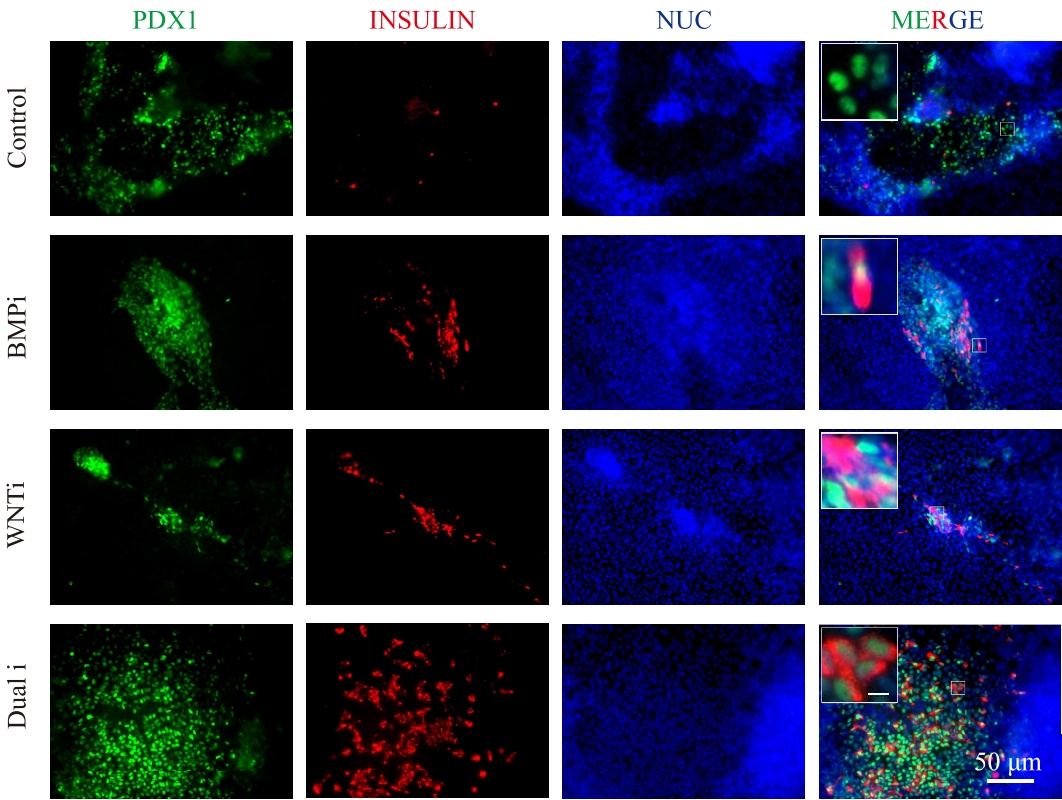

Supplement: f1 [file 5026793.f1.pdf]
